# Supplementary material for: T cell neoepitope discovery in colorectal cancer by high throughput profiling of somatic mutations in expressed genes
Source: PubMed Central journal article supplement — Gut. 2015 Dec 17;66(3):454–63. doi: 10.1136/gutjnl-2015-309453 (PMC5534766; doi:10.1136/gutjnl-2015-309453), 2015-12-17
Supplement: gutjnl-2015-309453supp002.pdf [file gutjnl-2015-309453supp002.pdf]

Supplemental Table 1. Clinical characteristics of CRC patients

| Patients                               |                                                                      |                                                                      |                                                                      |                                                                       |                                                                     |                                                                    |
|----------------------------------------|----------------------------------------------------------------------|----------------------------------------------------------------------|----------------------------------------------------------------------|-----------------------------------------------------------------------|---------------------------------------------------------------------|--------------------------------------------------------------------|
|                                        | 1076                                                                 | 1247                                                                 | 21052                                                                | 1546                                                                  | 23873                                                               | 1039                                                               |
| Sex                                    | M                                                                    | F                                                                    | F                                                                    | M                                                                     | F                                                                   | M                                                                  |
| date of birth                          | 15/12/22                                                             | 31/01/47                                                             | 09/04/39                                                             | 07/09/36                                                              | 06/02/63                                                            | 18/12/55                                                           |
| diagnosis age                          | 87                                                                   | 63                                                                   | 70                                                                   | 74                                                                    | 45                                                                  | 53                                                                 |
| anatomic stage                         | IIA                                                                  | IIA                                                                  | IIIB                                                                 | IVA                                                                   | IIA                                                                 | IIIC                                                               |
| Neo adjuvant therapy                   | no                                                                   | no                                                                   | no                                                                   | no                                                                    | no                                                                  | no                                                                 |
| treatment                              | surgical                                                             | surgical                                                             | surgical                                                             | surgical/ RT                                                          | surgical                                                            | surgical                                                           |
| pTNM                                   | pT3pN0 (0/17)                                                        | pT3pN0 (0/20)                                                        | pT3pN1 (2/31)                                                        | pT4apN2b (12/27)                                                      | pT3pN0 (0/8)                                                        | pT3pN2b (18/23)                                                    |
| histotype                              | adenoCA G3                                                           | adenoCA G3                                                           | adenoCA G2                                                           | adenoCA G2                                                            | adenoCA G2                                                          | adenoCA                                                            |
| DNA mismatch repair complex expression | Expressed MSH2,100,N,3<br>MLH1,100,N,3<br>PMS2,90,N,3<br>MSH6,90,N,3 | Expressed MSH2,100,N,2<br>MLH1,100,N,2<br>PMS2,90,N,2<br>MSH6,80,N,2 | Expressed MSH2,100,N,3<br>MLH1,100,N,3<br>PMS2,60,N,2<br>MSH6,90,N,3 | Expressed MSH2,100,N,3<br>MLH1,100,N,3<br>PMS2,80,N,2<br>MSH6,100,N,2 | Expressed MSH2,100,N,2<br>MLH1,80,N,2<br>PMS2,80,N,1<br>MSH6,60,N,2 | Expressed MSH2,80,N,2<br>MLH1,80,N,2<br>PMS2,90,N,2<br>MSH6,80,N,2 |
| adjuvant therapy                       | CT                                                                   | CT:<br>FOLFOX                                                        | CT:<br>FOLFOX                                                        | CT:<br>XELOX                                                          | CT:<br>FOLFOX                                                       | CT                                                                 |
| follow up                              | positive                                                             | negative                                                             | negative                                                             | positive                                                              | positive                                                            | positive                                                           |
| local recurrence                       | no                                                                   | no                                                                   | no                                                                   | yes                                                                   | no                                                                  | no                                                                 |
| treatment                              | -                                                                    | -                                                                    | -                                                                    | RT                                                                    | -                                                                   | -                                                                  |
| distant recurrence                     | liver                                                                | -                                                                    | -                                                                    | liver                                                                 | liver                                                               | liver; lung                                                        |
| Treatment                              | CT                                                                   | -                                                                    | -                                                                    | CT:CPT11,<br>Cetuximab                                                | surgical                                                            | surgical CT                                                        |
| DFS12                                  | 6 m.                                                                 | 4 y. and<br>6 m.                                                     | 4 y. and<br>4 m.                                                     | 4 m.                                                                  | 1 y. and<br>6 m.                                                    | 6 m.                                                               |
| OS13                                   | 10 m.                                                                | 4 y. and<br>6 m.                                                     | 4 y. and<br>8 m.                                                     | 1 y. and<br>2 m.                                                      | 2 y. and<br>6 m.                                                    | 1 y. and 4 m.                                                      |
| Death                                  | yes                                                                  | no                                                                   | no                                                                   | yes                                                                   | yes                                                                 | yes                                                                |
| cause of death                         | HF                                                                   | -                                                                    | -                                                                    | HF                                                                    | HF                                                                  | RF                                                                 |
| current disease stage                  | deceased                                                             | disease free                                                         | disease free                                                         | deceased                                                              | deceased                                                            | deceased                                                           |

RT: radiotherapy; adenoCA: adenocarcinoma; CT: chemotherapy; FOLFOX: folinic acid + fluorouracil + oxaliplatin; XELOX: capecitabine + oxaliplatin; DFS: disease free survival; OS: overall survival; HF: hepatic failure; RF: respiratory failure; DNA mismatch repair complex expression, shown as the percentage of tumor cells stained in immunohistochemistry by each Ab specific for the indicated protein of the complex. Indicated are the nuclear immunoreactivity (N) and the intensity of immunoreactivity on a 0-3 scale.
