# Supplementary material for: T cell neoepitope discovery in colorectal cancer by high throughput profiling of somatic mutations in expressed genes
Source: HighWire-hosted journal article supplement (doi:10.1136/gutjnl-2015-309453), 2015-12-17
Supplement: gutjnl-2015-309453supp_table2.pdf [file gutjnl-2015-309453supp_table2.pdf]

Supplemental Table 2. HLA typing of CRC cells investigated for T cell recognition of unique tumor antigens.

| Patient | HLA typing      |                 |                 |                 |          |          |                 |                 |                 |
|---------|-----------------|-----------------|-----------------|-----------------|----------|----------|-----------------|-----------------|-----------------|
|         | HLA-A           | HLA-B           | HLA-Cw          | HLA-DRβ1        | HLA-DRβ3 | HLA-DRβ4 | DQA1            | DQB1            | DPB1            |
| 1039    | 02:01,<br>33:01 | 10:24,<br>51:01 | 01:02,<br>08:02 | 01:02,<br>11:01 | 02:02    |          | 01:01,<br>05:05 | 03:01,<br>05:01 | 04:01,<br>11:01 |
| 1247    | 02,<br>03       | 15:01,<br>15:03 | 03:03,<br>04:01 | 01:01,<br>1101  | 02:02    |          | 01:01,<br>05:05 | 03:01,<br>05:01 | 03:01,<br>09:02 |
| 1869    | 03:01,<br>24:03 | 35:01,<br>38:01 | 0401,<br>1203   | 04:02,<br>13:01 | 01:01    | 01:03    | 0103,<br>0301   | 0302,<br>0603   | 02:01,<br>04:01 |
