# Supplementary material for: T cell neoepitope discovery in colorectal cancer by high throughput profiling of somatic mutations in expressed genes
Source: HighWire-hosted journal article supplement (doi:10.1136/gutjnl-2015-309453), 2015-12-17
Supplement: gutjnl-2015-309453supp_table3.pdf [file gutjnl-2015-309453supp_table3.pdf]

Supplemental Table 3. Synthetic peptides encompassing the somatic mutations found in the CRC cDNAs

| CRC  | peptides                                                                                                                                                                |                                                                                                                                                                       |                                                                                                                                                                    |
|------|-------------------------------------------------------------------------------------------------------------------------------------------------------------------------|-----------------------------------------------------------------------------------------------------------------------------------------------------------------------|--------------------------------------------------------------------------------------------------------------------------------------------------------------------|
| 1039 | KRAS <sup>G12D</sup><br>peptide mut-1 MTEYKLVVVGADGVG<br>peptide mut-2 -----KLVVVGADGVGKSAL<br>peptide mut-3 -----VGADGVGKSALTIQL<br>peptide WT MTEYKLVVVGAGGVG         |                                                                                                                                                                       |                                                                                                                                                                    |
|      | TP53 <sup>Y107D</sup><br>peptide mut-1 SVPSQKTYQGSDGFR<br>peptide mut-2 -----QKTYQGSDGFRLGFL<br>peptide mut-3 -----QGSDGFRLGFLHSGT<br>peptide WT SVPSQKTYQGSYGFR        |                                                                                                                                                                       |                                                                                                                                                                    |
|      | PIK3CA <sup>Q546K</sup><br>peptide mut-1 STRDPLSEITEKEKD<br>peptide mut-2 -----PLSEITEKEKDFLWS<br>peptide mut-3 -----ITEKEKDFLWSHRHY<br>peptide WT STRDPLSEITEQEKD      |                                                                                                                                                                       |                                                                                                                                                                    |
|      | 1247                                                                                                                                                                    | PIK3CA <sup>R770Q</sup><br>peptide mut-1 HQLGNLRLEECQIMS<br>peptide mut-2 -----NLRLEECQIMSSAKR<br>peptide mut-3 -----EECQIMSSAKRPLWL<br>peptide WT HQLGNLRLEECRIMS    |                                                                                                                                                                    |
|      |                                                                                                                                                                         | SMAD4 <sup>V370A</sup><br>peptide mut-1 GDRFCLGQLSNAHRT<br>peptide mut-2 -----CLGQLSNAHRTEAIE<br>peptide mut-3 -----LSNAHRTEAIERARL<br>peptide WT-1 GDRFCLGQLSNVHRT   |                                                                                                                                                                    |
|      |                                                                                                                                                                         | C10orf137 <sup>S168L</sup><br>peptide mut-1 DELDIQELFMRLSQT<br>peptide mut-2 -----IQELFMRLSQTGDWT<br>peptide mut-3 -----FMRLSQTGDWTWLKE<br>peptide WT DELDIQELFMRSSQT |                                                                                                                                                                    |
|      |                                                                                                                                                                         | 1869                                                                                                                                                                  | APC E1317KfsX4 (1288-1318)<br>peptide mut NQTTQEADSANTLQIAEIKEKIGTRSAKIL<br>peptide WT NQTTQEADSANTLQIAEIKEKIGTRSAEDP                                              |
|      |                                                                                                                                                                         |                                                                                                                                                                       | KRAS <sup>G12D</sup><br>peptide mut-1 MTEYKLVVVGADGVG<br>peptide mut-2 -----KLVVVGADGVGKSAL<br>peptide mut-3 -----VGADGVGKSALTIQL<br>peptide WT MTEYKLVVVGAGGVG    |
|      |                                                                                                                                                                         |                                                                                                                                                                       | TP53 <sup>R175H</sup><br>peptide mut-1 KQSQHMTEVVRHCPH<br>peptide mut-2 -----HMTEVVRHCPHHERC<br>peptide mut-3 -----VVRHCPHHERCSDSD<br>peptide WT-1 KQSQHMTEVVRRCPH |
|      | SMAD4 <sup>R361C</sup><br>peptide mut-1 VDG YVDPSGGDC FCL<br>peptide mut-2 -----VDPSGGDC FCLGQLS<br>peptide mut-3 -----GGDC FCLGQLSNVHR<br>peptide WT VDG YVDPSGGDR FCL |                                                                                                                                                                       |                                                                                                                                                                    |
